# Supplementary material for: A phase I pharmacokinetics trial comparing PF‐05280586 (a potential biosimilar) and rituximab in patients with active rheumatoid arthritis
Source: PubMed Central journal article supplement — Br J Clin Pharmacol. 2016 Apr 29;82(1):129–38. doi: 10.1111/bcp.12916 (PMC4917800; doi:10.1111/bcp.12916), 2016-04-29
Supplement: BCP-82-129-s004.pdf [file BCP-82-129-s004.pdf]

## Supplemental Table S2

Incidence of anti-drug antibodies by treatment (mITT population)

|                                                       | <b>PF-05280586<br/><i>n</i> = 73</b> | <b>Rituximab-EU<br/><i>n</i> = 74</b> | <b>Rituximab-US<br/><i>n</i> = 73</b> |
|-------------------------------------------------------|--------------------------------------|---------------------------------------|---------------------------------------|
| Samples tested, <i>n</i>                              |                                      |                                       |                                       |
| Baseline                                              | 73                                   | 74                                    | 73                                    |
| Post-dose                                             | 357                                  | 364                                   | 348                                   |
| Patients with pre-existing ADA,* <i>n</i>             |                                      |                                       |                                       |
| Positive at baseline only                             | 4                                    | 3                                     | 1                                     |
| Positive at baseline and $\geq 1$ sample<br>post-dose | 0                                    | 3                                     | 2                                     |
| Patients with treatment-emergent ADA                  |                                      |                                       |                                       |
| $\geq 1$ positive sample post-dose, <i>n</i>          | 7                                    | 10                                    | 9                                     |
| Percentage of patients in the group, %                | 9.6                                  | 13.5                                  | 12.3                                  |

\* Patients with pre-existing ADA had a baseline sample that tested positive for ADA mITT, modified intent-to-treat; ADA, anti-drug antibodies.
